# Supplementary material
Source: PubMed Central journal article supplement (PMC3458586)

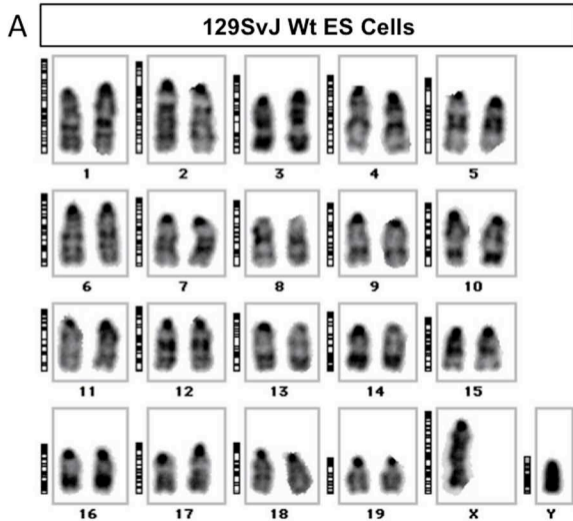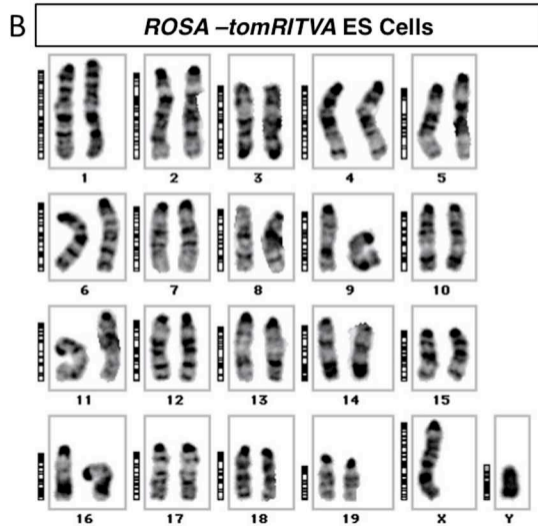

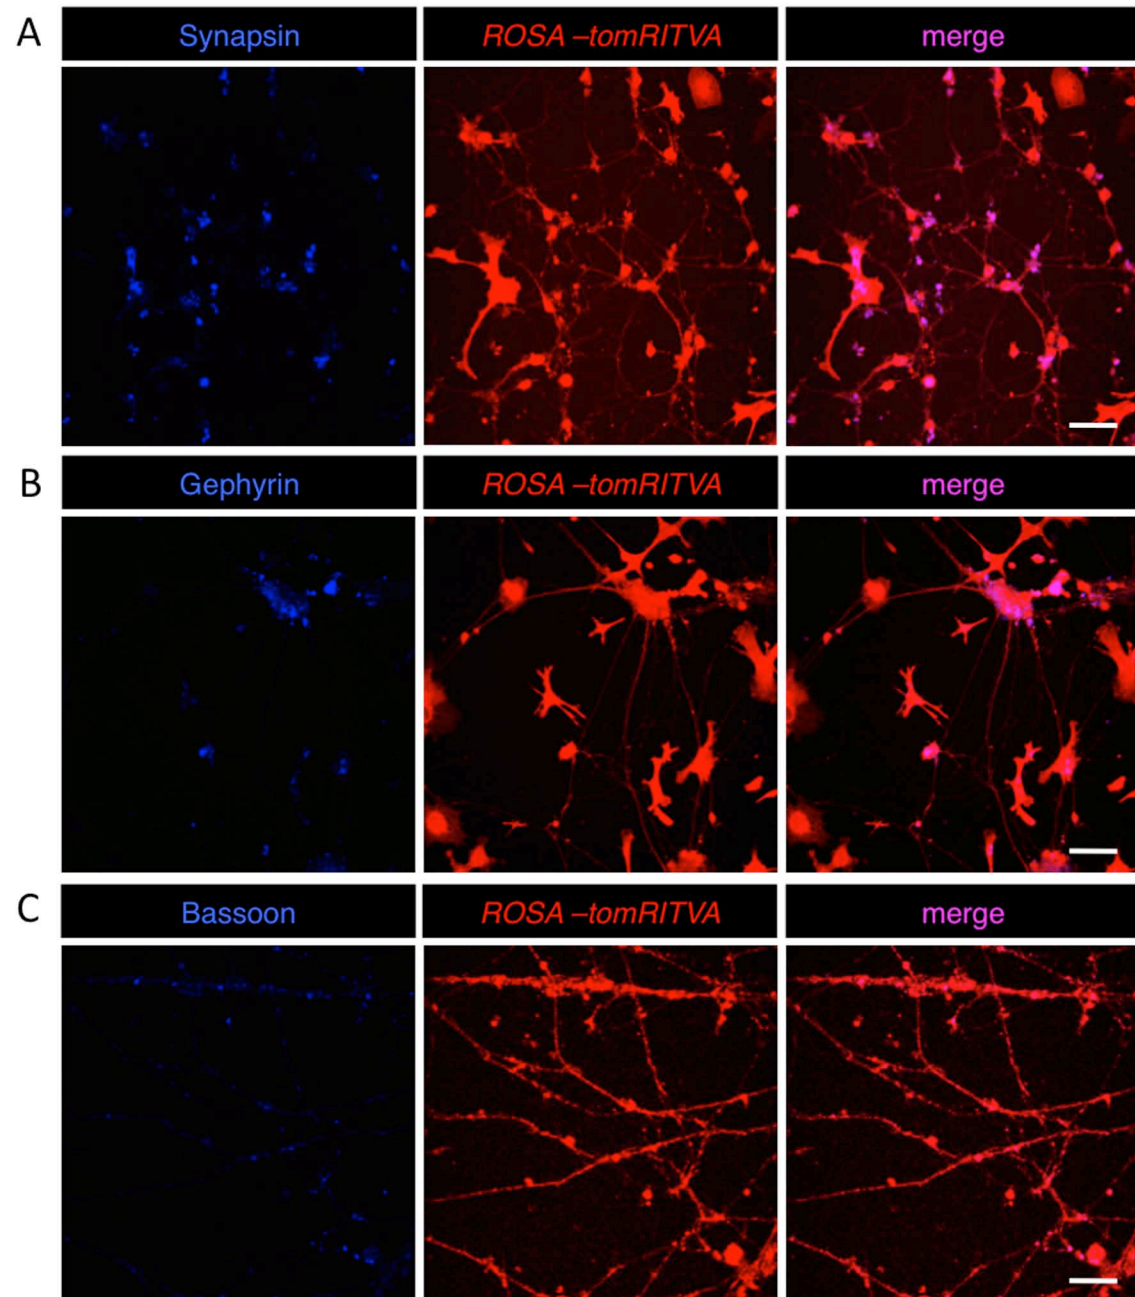

A

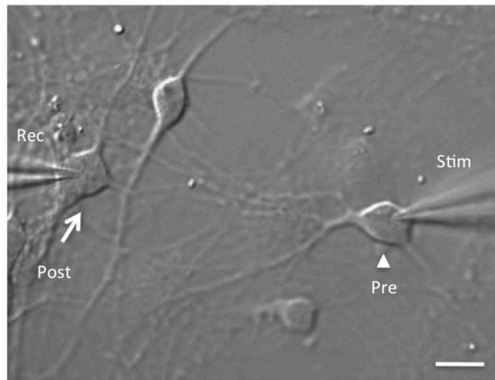

B

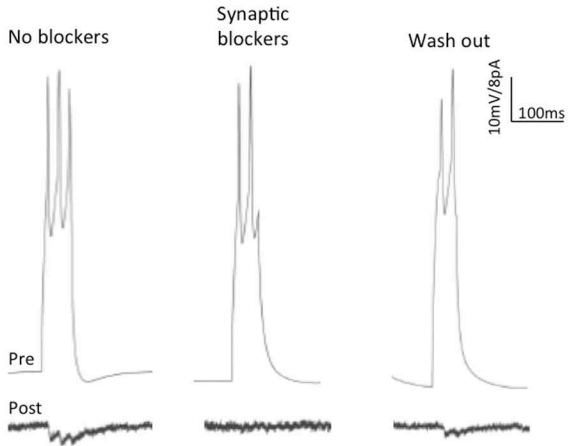

Supplement: NIHMS398924-supplement-Supp_Fig_S1-S3.pdf [file NIHMS398924-supplement-Supp_Fig_S1-S3.pdf]
